# Supplementary material
Source: PubMed Central journal article supplement (PMC4542440)
Supplement: supp_db15-0133_DB150133SupplementaryData.pdf [file supp_db15-0133_DB150133SupplementaryData.pdf]

## **The Metabolic Syndrome and Microvascular Complications in a Murine Model of Type 2 Diabetes**

**Running title:** Diabetic complications in *db/db* mice

Junguk Hur<sup>1,2§</sup>, Jacqueline R. Dauch<sup>1§</sup>, Lucy M. Hinder<sup>1</sup>, John M. Hayes<sup>1</sup>, Carey Backus<sup>1</sup>, Subramaniam Pennathur<sup>3</sup>, Matthias Kretzler<sup>3</sup>, Frank C. Brosius III<sup>3</sup> and Eva L. Feldman<sup>1\*</sup>

<sup>1</sup>Department of Neurology, University of Michigan, Ann Arbor, MI 48109, USA

<sup>2</sup>Department of Basic Sciences, University of North Dakota, School of Medicine and Health Sciences, Grand Forks, ND 58203, USA

<sup>3</sup>Division of Nephrology, Department of Internal Medicine, University of Michigan, Ann Arbor, MI 48109, USA

<sup>§</sup>These authors contributed equally.

\*Corresponding author:

Eva L. Feldman, MD, PhD  
Russell N. DeJong Professor of Neurology  
5017 AAT-BSRB, 109 Zina Pitcher Place  
Ann Arbor, Michigan 48109, United States  
Phone: (734) 763-7274 / Fax: (734) 763-7275  
Email: [efeldman@med.umich.edu](mailto:efeldman@med.umich.edu)

SUPPLEMENTARY DATA

**Supplementary Figure 1. Effects of pioglitazone on body weight.** Representative images of the *db/db* mouse following 11wk of pioglitazone treatment (A) and untreated *db/db* mouse (B)

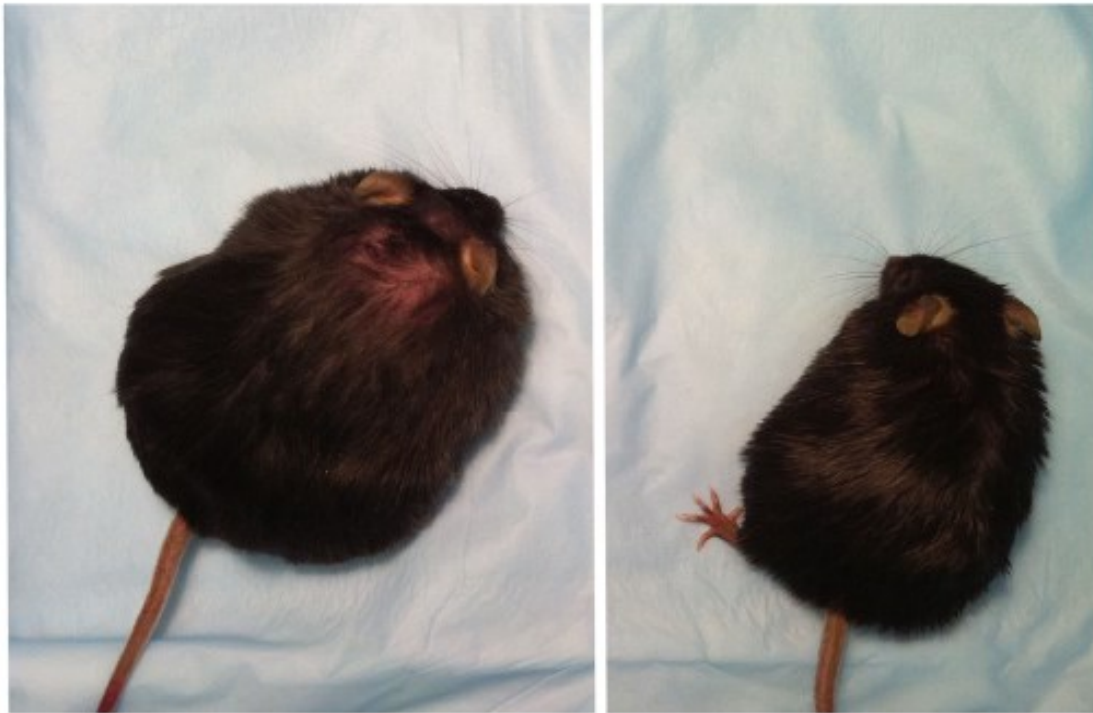

A. *db/db* PIO

B. *db/db*

## SUPPLEMENTARY DATA

**Supplementary Figure 2. Effects of pioglitazone on GHb level in plasma.** Following 11 weeks of pioglitazone treatment GHb (mmol/mol) was assessed. \*  $p < 0.05$ ; \*\*  $p < 0.01$ ; \*\*\*  $p < 0.001$ . In all panels,  $n = 6$ .

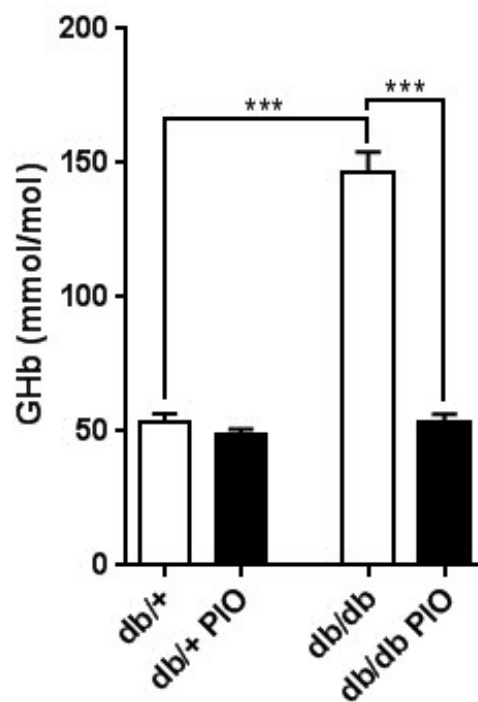

## SUPPLEMENTARY DATA

**Supplementary Figure 3. Effects of pioglitazone on kidney function.** Following 11 weeks of pioglitazone treatment, 24-hour urinary albumin excretion (A), albuminuria, based on albumin/creatinine ratios (ACRs) (B), and mesangial matrix accumulation (C) were assessed. \*\*\*  $p < 0.001$ . In all panels,  $n = 6$ .

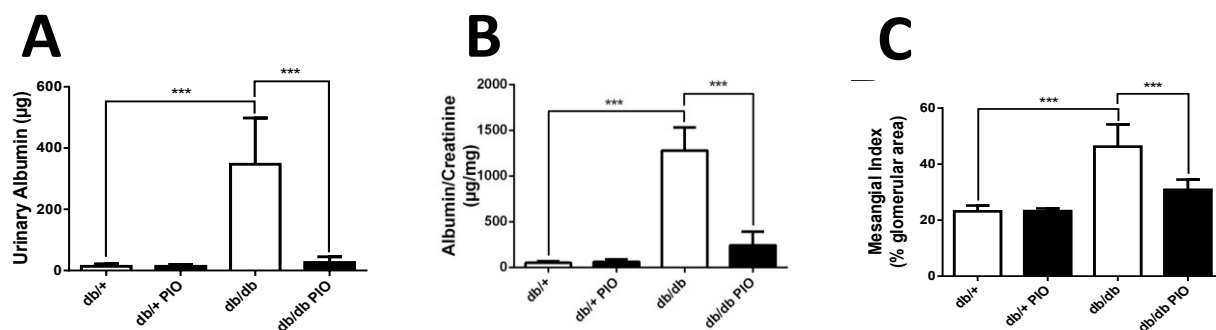

SUPPLEMENTARY DATA

**Supplementary Figure 4. Effects on pioglitazone on diabetic glomerulopathy.** Changes in glomerular matrix accumulation using a periodic acid Schiff (PAS) stain (A) for four animal groups (A1: *db/+*, A2: *db/+* PIO, A3: *db/db*, and A4: *db/db* PIO) and assessments of glomerular area (B) and glomerular PAS-positive area (C). \*\*  $p < 0.01$ ; \*\*\*  $p < 0.001$ . In all groups,  $n = 6$ .

**A**

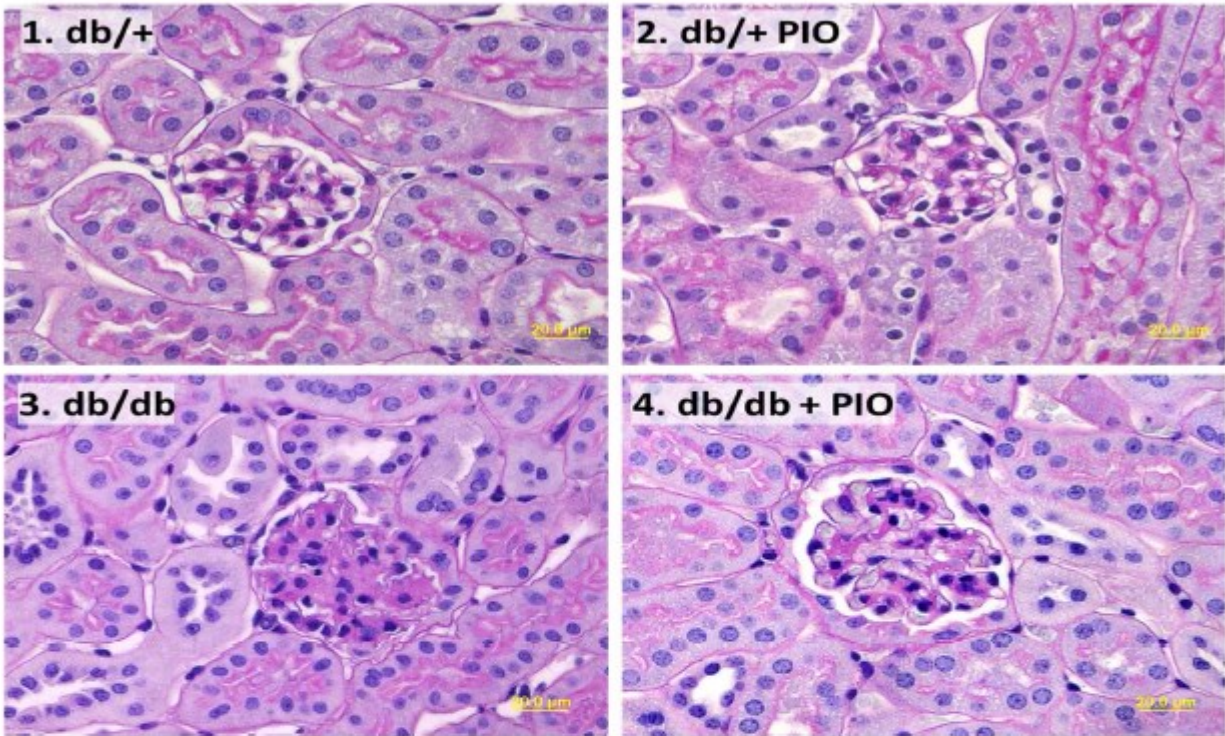

**B**

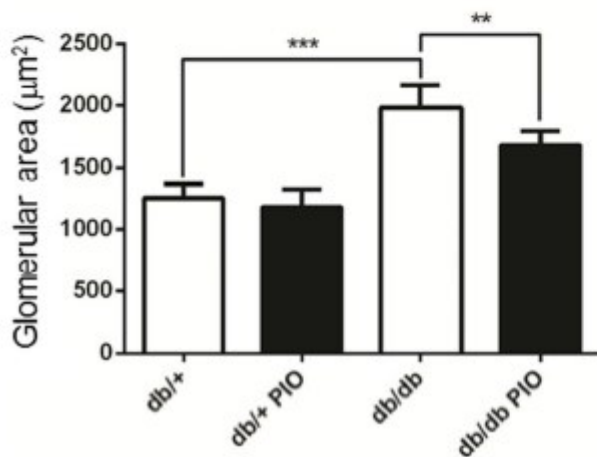

**C**

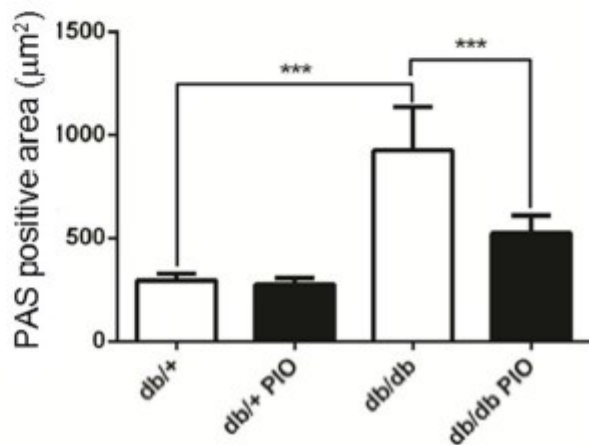

SUPPLEMENTARY DATA

**Supplementary Table 1.** List of primers used for validation of gene expression data by RT-qPCR. Primers were selected using PrimerBank (<http://pga.mgh.harvard.edu/primerbank/>) and purchased from Integrated DNA Technologies.

| GeneID | Primer          |         | Sequence                  | Fragment Size (bp) |
|--------|-----------------|---------|---------------------------|--------------------|
| 93726  | <i>Ear11</i>    | Forward | TGGAGCAACTTGAGTCTCGAC     | 130                |
|        |                 | Reverse | CGGGGATAGGCTCTGTTATAGA    |                    |
| 19017  | <i>Ppargc1a</i> | Forward | CTGTATGGAGTGACATAGAGTGTGC | 120                |
|        |                 | Reverse | GAAAGCTGTCTGTATCCAAGTCATT |                    |
| 216343 | <i>Tph2</i>     | Forward | TATGGAGCAGGGTACTTTCGT     | 126                |
|        |                 | Reverse | GTCCTGAAAGGTGGTGATTAGG    |                    |
| 22227  | <i>Ucp1</i>     | Forward | AGGCTTCCAGTACCATTAGGT     | 133                |
|        |                 | Reverse | CTGAGTGAGGCAAAGCTGATTT    |                    |

SUPPLEMENTARY DATA

**Supplementary Table 2. Validation of microarray data using RT-PCR.** Table indicates the fold change (FC) of DEGs, against Tyrosine 3-Monooxygenase/Tryptophan 5-Monooxygenase Activation (*Ywhaz*) gene as the endogenous control, from microarray that were selected for validation by RT-qPCR. \*, p<0.05, \*\*\*, p<0.001

| 16 wk DEG                                                                   | Symbol          | Gene ID | Array (FC)<br><i>db/db</i> vs.<br><i>db/db</i> PIO | qPCR (FC)<br><i>db/db</i> vs.<br><i>db/db</i> PIO |
|-----------------------------------------------------------------------------|-----------------|---------|----------------------------------------------------|---------------------------------------------------|
| uncoupling protein 1 (mitochondrial, proton carrier)                        | <i>UCP1</i>     | 22227   | 8.75                                               | 3.80***                                           |
| acetyl-Coenzyme A acyltransferase 1B                                        | <i>Acaa1b</i>   | 235674  | 2.43                                               | 1.11                                              |
| cell death-inducing DNA fragmentation factor, alpha subunit-like effector A | <i>Cidea</i>    | 12683   | 1.95                                               | 2.51*                                             |
| peroxisome proliferative activated receptor, gamma, coactivator 1 alpha     | <i>Ppargc1a</i> | 19017   | 1.23                                               | 1.05                                              |

SUPPLEMENTARY DATA

**Supplementary Table 3. The overlap summary of the four DRG DEG sets in Figure 5A.** The numbers in each cell follow the "A (B | C)" format, where A is the number of common DEGs, B is the number of common DEGs with the same direction of change, and C is the number of DEGs with opposite direction of change.

| DEG Sets                            |        | <i>db/+ vs db/+</i> PIO | <i>db/+ vs db/db</i> | <i>db/+</i> PIO vs <i>db/db</i> PIO | <i>db/db vs db/db</i> PIO |
|-------------------------------------|--------|-------------------------|----------------------|-------------------------------------|---------------------------|
|                                     | # DEGs | 24                      | 2082                 | 2478                                | 1811                      |
| <i>db/+ vs db/+</i> PIO             | 24     | 24 (24 0)               | 12 (12 0)            | 6 (4 2)                             | 4 (4 0)                   |
| <i>db/+ vs db/db</i>                | 2082   | 12 (12 0)               | 2082 (2082 0)        | 804 (758 46)                        | 455 (116 339)             |
| <i>db/+</i> PIO vs <i>db/db</i> PIO | 2478   | 6 (4 2)                 | 804 (758 46)         | 2478 (2478 0)                       | 802 (784 18)              |
| <i>db/db vs db/db</i> PIO           | 1811   | 4 (4 0)                 | 455 (116 339)        | 802 (784 18)                        | 1811 (1811 0)             |



SUPPLEMENTARY DATA

**Supplementary Table 4. The 20 most up-regulated genes and 20 most down-regulated genes that are dysregulated by diabetes and reversed by pioglitazone treatment in DRG.** FC: fold-change; FDR: false discovery rate. Color indicates the up (red) or down (blue) regulation in the second group (eg. *db/db* in the *db/+* vs *db/db* comparison)

| GeneID | Symbol        | Description                                            | <i>db/+</i> vs <i>db/db</i> |         | <i>db/db</i> vs <i>db/db</i> PIO |         |
|--------|---------------|--------------------------------------------------------|-----------------------------|---------|----------------------------------|---------|
|        |               |                                                        | FC                          | FDR     | FC                               | FDR     |
| 12655  | Chi3l3        | chitinase 3-like 3                                     | 5.36                        | 4.7E-04 | -2.66                            | 9.6E-03 |
| 11656  | Alas2         | aminolevulinic acid synthase 2, erythroid              | 3.74                        | 8.1E-03 | -3.68                            | 2.1E-02 |
| 268885 | Stfa2l1       | stefin A2 like 1                                       | 3.62                        | 1.5E-04 | -2.22                            | 1.4E-02 |
| 213002 | Ifitm6        | interferon induced transmembrane protein 6             | 3.28                        | 6.9E-04 | -3.01                            | 3.5E-03 |
| 17394  | Mmp8          | matrix metalloproteinase 8                             | 2.92                        | 2.5E-03 | -3.25                            | 4.1E-03 |
| 68891  | Cd177         | CD177 antigen                                          | 2.91                        | 2.2E-03 | -2.91                            | 9.3E-03 |
| 12765  | Cxcr2         | chemokine (C-X-C motif) receptor 2                     | 2.78                        | 9.6E-03 | -2.87                            | 8.7E-03 |
| 17523  | Mpo           | myeloperoxidase                                        | 2.71                        | 5.9E-03 | -2.44                            | 2.0E-02 |
| 13586  | Ear1          | eosinophil-associated, ribonuclease A family, member 1 | 2.61                        | 2.6E-02 | -3.50                            | 2.1E-02 |
| 14289  | Fpr2          | formyl peptide receptor 2                              | 2.59                        | 5.9E-04 | -2.53                            | 3.4E-03 |
| 11813  | Apoc2         | apolipoprotein C-II                                    | 2.54                        | 2.9E-05 | -1.48                            | 8.5E-03 |
| 15439  | Hp            | haptoglobin                                            | 2.47                        | 5.5E-04 | -1.58                            | 4.0E-02 |
| 13035  | Ctsg          | cathepsin G                                            | 2.46                        | 8.4E-03 | -2.07                            | 3.9E-02 |
| 16819  | Lcn2          | lipocalin 2                                            | 2.31                        | 2.5E-03 | -2.38                            | 7.0E-03 |
| 17002  | Ltf           | lactotransferrin                                       | 2.21                        | 9.1E-03 | -3.37                            | 3.4E-03 |
| 20305  | Ccl6          | chemokine (C-C motif) ligand 6                         | 2.16                        | 2.5E-03 | -1.55                            | 2.2E-02 |
| 69189  | 1810033B17Rik | RIKEN cDNA 1810033B17 gene                             | 2.14                        | 1.3E-02 | -2.65                            | 6.2E-03 |
| 66107  | 1100001G20Rik | RIKEN cDNA 1100001G20 gene                             | 2.14                        | 1.3E-02 | -2.78                            | 2.9E-03 |
| 14293  | Fpr1          | formyl peptide receptor 1                              | 2.10                        | 2.1E-02 | -2.32                            | 2.2E-02 |
| 17395  | Mmp9          | matrix metalloproteinase 9                             | 2.03                        | 7.4E-03 | -2.18                            | 1.1E-02 |
| 71354  | Wdr31         | WD repeat domain 31                                    | -1.28                       | 3.0E-02 | 1.34                             | 2.8E-02 |
| 20600  | Smr2          | submaxillary gland androgen regulated protein 2        | -1.28                       | 4.3E-02 | 1.32                             | 7.0E-03 |
| 233066 | Syne4         | expressed sequence AI428936                            | -1.28                       | 8.1E-03 | 1.16                             | 1.8E-02 |
| 17873  | Gadd45b       | growth arrest and DNA-damage-inducible 45 beta         | -1.28                       | 3.9E-04 | 1.11                             | 4.1E-02 |
| 233040 | Fbxo27        | F-box protein 27                                       | -1.29                       | 2.9E-03 | 1.18                             | 1.4E-02 |
| 67188  | 2700046G09Rik | RIKEN cDNA 2700046G09 gene                             | -1.29                       | 7.9E-03 | 1.30                             | 5.7E-03 |

SUPPLEMENTARY DATA

| GeneID    | Symbol        | Description                                                        | <i>db/+ vs db/db</i> |         | <i>db/db vs db/db PIO</i> |         |
|-----------|---------------|--------------------------------------------------------------------|----------------------|---------|---------------------------|---------|
|           |               |                                                                    | FC                   | FDR     | FC                        | FDR     |
| 100503092 | Gm19550       | hypothetical LOC100503092                                          | -1.30                | 1.1E-03 | 1.14                      | 3.8E-02 |
| 69358     | Lrrc51        | leucine rich repeat containing 51                                  | -1.30                | 2.8E-03 | 1.14                      | 3.5E-02 |
| 170458    | Gpha2         | glycoprotein hormone alpha 2                                       | -1.31                | 1.9E-02 | 1.37                      | 1.3E-02 |
| 66120     | Fkbp11        | FK506 binding protein 11                                           | -1.32                | 6.0E-03 | 1.19                      | 4.2E-02 |
| 212390    | Klhl32        | kelch-like 32 (Drosophila)                                         | -1.34                | 1.8E-03 | 1.19                      | 2.9E-02 |
| 237625    | Pla2g3        | phospholipase A2, group III                                        | -1.35                | 2.2E-03 | 1.27                      | 8.3E-03 |
| 67119     | Ccdc159       | coiled-coil domain containing 159                                  | -1.38                | 2.3E-03 | 1.16                      | 4.1E-02 |
| 75579     | 2310034G01Rik | RIKEN cDNA 2310034G01 gene                                         | -1.39                | 1.6E-02 | 1.31                      | 2.3E-02 |
| 104362    | Meig1         | meiosis expressed gene 1                                           | -1.43                | 4.0E-03 | 1.23                      | 2.4E-02 |
| 235330    | Ttc12         | tetratricopeptide repeat domain 12                                 | -1.43                | 2.3E-04 | 1.19                      | 1.8E-02 |
| 27274     | Zfp354b       | zinc finger protein 354B                                           | -1.45                | 1.6E-02 | 1.30                      | 4.4E-02 |
| 28240     | Trpm2         | transient receptor potential cation channel, subfamily M, member 2 | -1.45                | 1.6E-03 | 1.17                      | 3.3E-02 |
| 140743    | Rem2          | rad and gem related GTP binding protein 2                          | -1.48                | 3.9E-05 | 1.25                      | 8.5E-03 |
| 232146    | Eva1a         | family with sequence similarity 176, member A                      | -1.50                | 3.4E-03 | 1.33                      | 1.8E-02 |

SUPPLEMENTARY DATA

**Supplementary Table 5. The 20 most up-regulated genes and 20 most down-regulated genes that are dysregulated by diabetes and exacerbated by pioglitazone treatment in DRG.** FC: fold-change; FDR: false discovery rate. Color indicates the up (red) or down (blue) regulation in the second group (eg. *db/db* in the *db/+* vs *db/db* comparison)

| GeneID | Symbol        | Description                                                          | <i>db/+</i> vs <i>db/db</i> |         | <i>db/db</i> vs <i>db/db</i> PIO |         |
|--------|---------------|----------------------------------------------------------------------|-----------------------------|---------|----------------------------------|---------|
|        |               |                                                                      | FC                          | FDR     | FC                               | FDR     |
| 71760  | Agxt2l1       | alanine-glyoxylate aminotransferase 2-like 1                         | 3.80                        | 2.9E-05 | 1.47                             | 8.2E-03 |
| 12491  | Cd36          | CD36 antigen                                                         | 2.30                        | 2.4E-03 | 2.53                             | 1.0E-02 |
| 11450  | Adipoq        | adiponectin, C1Q and collagen domain containing                      | 2.21                        | 3.8E-02 | 4.18                             | 6.4E-03 |
| 16846  | Lep           | leptin                                                               | 1.88                        | 2.6E-02 | 4.86                             | 4.9E-03 |
| 71406  | 5430416O09Rik | RIKEN cDNA 5430416O09 gene                                           | 1.87                        | 6.0E-04 | 1.36                             | 3.0E-02 |
| 70358  | Steap1        | six transmembrane epithelial antigen of the prostate 1               | 1.60                        | 5.6E-03 | 1.31                             | 2.1E-02 |
| 230379 | Acer2         | alkaline ceramidase 2                                                | 1.47                        | 1.6E-02 | 1.68                             | 2.6E-03 |
| 54153  | Rasa4         | RAS p21 protein activator 4                                          | 1.38                        | 2.7E-04 | 1.17                             | 9.3E-03 |
| 207798 | Gramd1c       | GRAM domain containing 1C                                            | 1.36                        | 2.8E-03 | 1.39                             | 1.3E-03 |
| 68453  | Gpihbp1       | GPI-anchored HDL-binding protein 1                                   | 1.36                        | 3.9E-02 | 1.61                             | 3.4E-03 |
| 75180  | 4930538K18Rik | RIKEN cDNA 4930538K18 gene                                           | 1.34                        | 3.0E-02 | 1.42                             | 4.7E-02 |
| 237246 | BC022960      | cDNA sequence BC022960                                               | 1.31                        | 1.2E-02 | 1.35                             | 2.2E-02 |
| 78751  | Zc3h6         | zinc finger CCCH type containing 6                                   | 1.30                        | 4.1E-02 | 1.41                             | 4.3E-03 |
| 16890  | Lipe          | lipase, hormone sensitive                                            | 1.30                        | 4.8E-02 | 1.85                             | 2.4E-02 |
| 56448  | Cyp2d22       | cytochrome P450, family 2, subfamily d, polypeptide 22               | 1.30                        | 3.7E-03 | 1.30                             | 4.5E-03 |
| 53608  | Map3k6        | mitogen-activated protein kinase kinase kinase 6                     | 1.29                        | 7.9E-03 | 1.19                             | 3.0E-02 |
| 20514  | Slc1a5        | solute carrier family 1 (neutral amino acid transporter), member 5   | 1.29                        | 9.7E-03 | 1.19                             | 4.7E-02 |
| 269630 | 5031425E22Rik | RIKEN cDNA 5031425E22 gene                                           | 1.26                        | 3.4E-02 | 1.24                             | 2.6E-02 |
| 73001  | 2900055J20Rik | RIKEN cDNA 2900055J20 gene                                           | 1.25                        | 2.4E-03 | 1.48                             | 4.0E-03 |
| 216233 | Socs2         | suppressor of cytokine signaling 2                                   | 1.25                        | 2.5E-03 | 1.16                             | 2.4E-02 |
| 230235 | Frrs1l        | RIKEN cDNA 6430704M03 gene                                           | -1.22                       | 1.3E-02 | -1.17                            | 4.5E-02 |
| 16416  | Itgb3         | integrin beta 3                                                      | -1.22                       | 2.2E-02 | -1.49                            | 1.3E-02 |
| 378462 | Morn2         | MORN repeat containing 2                                             | -1.22                       | 1.0E-03 | -1.10                            | 3.0E-02 |
| 12168  | Bmpr2         | bone morphogenic protein receptor, type II (serine/threonine kinase) | -1.22                       | 2.0E-02 | -1.15                            | 3.5E-02 |
| 12443  | Ccnd1         | cyclin D1                                                            | -1.22                       | 9.5E-04 | -1.33                            | 4.6E-04 |
| 234700 | Nrn1l         | neuritin 1-like                                                      | -1.23                       | 4.3E-03 | -1.15                            | 3.4E-02 |

SUPPLEMENTARY DATA

| GeneID | Symbol   | Description                                                                                    | <i>db/+ vs db/db</i> |         | <i>db/db vs db/db PIO</i> |         |
|--------|----------|------------------------------------------------------------------------------------------------|----------------------|---------|---------------------------|---------|
|        |          |                                                                                                | FC                   | FDR     | FC                        | FDR     |
| 22027  | Hsp90b1  | heat shock protein 90, beta (Grp94), member 1                                                  | -1.23                | 9.4E-04 | -1.17                     | 3.1E-03 |
| 70356  | St13     | suppression of tumorigenicity 13                                                               | -1.24                | 8.9E-03 | -1.24                     | 1.4E-02 |
| 15505  | Hsph1    | heat shock 105kDa/110kDa protein 1                                                             | -1.24                | 4.9E-04 | -1.21                     | 2.6E-03 |
| 12140  | Fabp7    | fatty acid binding protein 7, brain                                                            | -1.24                | 3.8E-03 | -1.42                     | 1.3E-02 |
| 216166 | Plk5     | polo-like kinase 5 (Drosophila)                                                                | -1.29                | 1.2E-02 | -1.31                     | 1.4E-02 |
| 106869 | Tnfaip8  | tumor necrosis factor, alpha-induced protein 8                                                 | -1.34                | 6.3E-03 | -1.40                     | 1.8E-02 |
| 16840  | Lect1    | leukocyte cell derived chemotaxin 1                                                            | -1.34                | 2.2E-04 | -1.13                     | 2.8E-02 |
| 384061 | Fndc5    | fibronectin type III domain containing 5                                                       | -1.39                | 2.5E-04 | -1.12                     | 4.3E-02 |
| 18451  | P4ha1    | procollagen-proline, 2-oxoglutarate 4-dioxygenase (proline 4-hydroxylase), alpha 1 polypeptide | -1.46                | 9.1E-04 | -1.30                     | 2.8E-02 |
| 170813 | Ms4a3    | membrane-spanning 4-domains, subfamily A, member 3                                             | -1.47                | 2.7E-03 | -1.46                     | 8.4E-03 |
| 12406  | Serpinh1 | serine (or cysteine) peptidase inhibitor, clade H, member 1                                    | -1.53                | 8.4E-03 | -1.88                     | 2.0E-03 |
| 71111  | Gpr39    | G protein-coupled receptor 39                                                                  | -1.57                | 6.9E-03 | -1.37                     | 5.0E-03 |
| 20290  | Ccl1     | chemokine (C-C motif) ligand 1                                                                 | -1.61                | 9.0E-04 | -1.26                     | 4.3E-02 |
| 72585  | Lypd1    | Ly6/Plaur domain containing 1                                                                  | -1.62                | 1.5E-03 | -1.32                     | 2.9E-03 |

SUPPLEMENTARY DATA

**Supplementary Table 6. The 20 most up-regulated genes and 20 most down-regulated genes that are dysregulated only by diabetes (*db/+* vs *db/db*) and not by pioglitazone treatment in DRG.** FC: fold-change; FDR: false discovery rate.

| GeneID    | Symbol   | Description                                              | FC    | FDR     |
|-----------|----------|----------------------------------------------------------|-------|---------|
| 16017     | Ighg1    | immunoglobulin heavy constant gamma 1 (G1m marker)       | 4.08  | 1.8E-02 |
| 16016     | Ighg2b   | immunoglobulin heavy constant gamma 2B                   | 3.91  | 8.7E-04 |
| 20533     | Slc4a1   | solute carrier family 4 (anion exchanger), member 1      | 3.11  | 8.9E-03 |
| 13034     | Ctse     | cathepsin E                                              | 2.88  | 6.4E-03 |
| 57435     | Plin4    | perilipin 4                                              | 2.86  | 1.4E-03 |
| 14934     | Gypa     | glycophorin A                                            | 2.84  | 4.1E-02 |
| 234421    | Cib3     | calcium and integrin binding family member 3             | 2.54  | 7.7E-05 |
| 20863     | Stfa3    | stefin A3                                                | 2.51  | 4.1E-03 |
| 14063     | F2rl1    | coagulation factor II (thrombin) receptor-like 1         | 2.46  | 2.9E-05 |
| 110595    | Timp4    | tissue inhibitor of metalloproteinase 4                  | 2.29  | 1.1E-02 |
| 19824     | Trim10   | tripartite motif-containing 10                           | 2.28  | 2.5E-02 |
| 100503518 | Gm11827  | hypothetical LOC100503518                                | 2.24  | 1.0E-02 |
| 16997     | Ltbp2    | latent transforming growth factor beta binding protein 2 | 2.16  | 2.9E-05 |
| 14460     | Gata1    | GATA binding protein 1                                   | 2.13  | 1.3E-02 |
| 18405     | Orm1     | orosomuroid 1                                            | 2.06  | 3.5E-03 |
| 21349     | Tal1     | T-cell acute lymphocytic leukemia 1                      | 2.01  | 1.7E-02 |
| 213068    | Tmem71   | transmembrane protein 71                                 | 1.95  | 1.3E-02 |
| 20284     | Scrg1    | scrapie responsive gene 1                                | 1.84  | 1.6E-02 |
| 74720     | Cldn26   | transmembrane protein 114                                | 1.79  | 2.3E-04 |
| 93671     | Cd163    | CD163 antigen                                            | 1.77  | 3.1E-03 |
| 71412     | Dhrs2    | dehydrogenase/reductase member 2                         | -1.58 | 1.0E-04 |
| 99899     | Ifi44    | interferon-induced protein 44                            | -1.61 | 2.7E-03 |
| 99571     | Fgg      | fibrinogen gamma chain                                   | -1.65 | 4.7E-03 |
| 12970     | Crygs    | crystallin, gamma S                                      | -1.68 | 9.5E-04 |
| 193740    | Hspa1a   | heat shock protein 1A                                    | -1.68 | 9.8E-03 |
| 219132    | Phf11d   | DNA segment, Chr 14, ERATO Doi 668, expressed            | -1.68 | 5.3E-03 |
| 24110     | Usp18    | ubiquitin specific peptidase 18                          | -1.68 | 5.6E-03 |
| 85030     | Tnfrsf25 | tumor necrosis factor receptor superfamily, member 25    | -1.70 | 1.3E-02 |

SUPPLEMENTARY DATA

| GeneID | Symbol        | Description                                                 | FC    | FDR     |
|--------|---------------|-------------------------------------------------------------|-------|---------|
| 58807  | Slco1c1       | solute carrier organic anion transporter family, member 1c1 | -1.72 | 1.2E-04 |
| 107146 | Glyat         | glycine-N-acyltransferase                                   | -1.78 | 1.3E-02 |
| 210463 | Slc22a22      | cDNA sequence BC026439                                      | -1.79 | 5.1E-04 |
| 246048 | Chodl         | chondrolectin                                               | -1.80 | 3.6E-03 |
| 97114  | Hist2h3c2     | histone cluster 2, H3c2, pseudogene                         | -1.80 | 2.9E-05 |
| 229550 | 9130204L05Rik | RIKEN cDNA 9130204L05 gene                                  | -1.84 | 2.0E-02 |
| 16019  | Ighm          | immunoglobulin heavy chain 6 (heavy chain of IgM)           | -1.84 | 5.0E-03 |
| 18857  | Pmp2          | peripheral myelin protein 2                                 | -1.97 | 3.5E-03 |
| 74748  | Slamf8        | SLAM family member 8                                        | -1.97 | 3.2E-02 |
| 57262  | Retnla        | resistin like alpha                                         | -2.14 | 2.0E-02 |
| 66198  | Them5         | thioesterase superfamily member 5                           | -2.16 | 1.2E-04 |
| 109254 | Adtrp         | RIKEN cDNA 9530008L14 gene                                  | -2.45 | 5.5E-04 |

SUPPLEMENTARY DATA

**Supplementary Table 7. The 20 most up-regulated genes and 20 most down-regulated genes that are dysregulated only by pioglitazone treatment (*db/db* vs *db/db* PIO) and not by diabetes (*db/+* vs *db/db*) in DRG. FC: fold-change; FDR: false discovery rate.**

| GeneID    | Symbol   | Description                                                                 | FC    | FDR     |
|-----------|----------|-----------------------------------------------------------------------------|-------|---------|
| 22227     | Ucp1     | uncoupling protein 1 (mitochondrial, proton carrier)                        | 8.75  | 4.3E-03 |
| 14311     | Cidec    | cell death-inducing DFFA-like effector c                                    | 6.86  | 1.3E-03 |
| 11770     | Fabp4    | fatty acid binding protein 4, adipocyte                                     | 5.10  | 5.6E-04 |
| 93726     | Ear11    | eosinophil-associated, ribonuclease A family, member 11                     | 4.85  | 6.6E-04 |
| 13106     | Cyp2e1   | cytochrome P450, family 2, subfamily e, polypeptide 1                       | 4.64  | 6.5E-03 |
| 24108     | Ubd      | ubiquitin D                                                                 | 4.03  | 3.4E-03 |
| 63954     | Rbp7     | retinol binding protein 7, cellular                                         | 2.96  | 1.9E-04 |
| 246747    | Adig     | adipogenin                                                                  | 2.95  | 1.2E-03 |
| 16956     | Lpl      | lipoprotein lipase                                                          | 2.91  | 3.9E-03 |
| 57264     | Retn     | resistin                                                                    | 2.49  | 6.8E-03 |
| 235674    | Acaa1b   | acetyl-Coenzyme A acyltransferase 1B                                        | 2.43  | 6.2E-03 |
| 13850     | Ephx2    | epoxide hydrolase 2, cytoplasmic                                            | 2.11  | 3.4E-03 |
| 71939     | Apo16    | apolipoprotein L 6                                                          | 2.07  | 4.1E-02 |
| 58805     | Mlxipl   | MLX interacting protein-like                                                | 1.98  | 4.0E-02 |
| 12683     | Cidea    | cell death-inducing DNA fragmentation factor, alpha subunit-like effector A | 1.95  | 9.5E-03 |
| 18113     | Nnmt     | nicotinamide N-methyltransferase                                            | 1.91  | 4.1E-02 |
| 232493    | Gys2     | glycogen synthase 2                                                         | 1.85  | 2.6E-02 |
| 13120     | Cyp4b1   | cytochrome P450, family 4, subfamily b, polypeptide 1                       | 1.84  | 5.4E-03 |
| 240239    | Gpr151   | G protein-coupled receptor 151                                              | 1.79  | 4.8E-02 |
| 22690     | Zfp28    | zinc finger protein 28                                                      | 1.67  | 6.7E-04 |
| 11537     | Cfd      | complement factor D (adipsin)                                               | -1.86 | 4.8E-02 |
| 60361     | Ms4a4b   | membrane-spanning 4-domains, subfamily A, member 4B                         | -1.91 | 6.4E-03 |
| 15985     | Cd79b    | CD79B antigen                                                               | -1.92 | 5.4E-03 |
| 14960     | H2-Aa    | histocompatibility 2, class II antigen A, alpha                             | -1.93 | 2.6E-03 |
| 227929    | Cytip    | cytohesin 1 interacting protein                                             | -1.93 | 2.6E-03 |
| 20345     | Selplg   | selectin, platelet (p-selectin) ligand                                      | -1.94 | 1.4E-02 |
| 100504404 | H2-Ea-ps | h-2 class II histocompatibility antigen, E-K alpha chain-like               | -2.04 | 2.6E-03 |
| 21973     | Top2a    | topoisomerase (DNA) II alpha                                                | -2.08 | 8.0E-03 |

SUPPLEMENTARY DATA

| GeneID | Symbol  | Description                                         | FC    | FDR     |
|--------|---------|-----------------------------------------------------|-------|---------|
| 50706  | Postn   | periostin, osteoblast specific factor               | -2.09 | 5.0E-04 |
| 14969  | H2-Eb1  | histocompatibility 2, class II antigen E beta       | -2.11 | 2.6E-03 |
| 11687  | Alox15  | arachidonate 15-lipoxygenase                        | -2.18 | 3.4E-02 |
| 16071  | Igkc    | immunoglobulin kappa chain, constant region         | -2.28 | 2.1E-02 |
| 23833  | Cd52    | CD52 antigen                                        | -2.43 | 1.3E-03 |
| 53856  | Prg3    | proteoglycan 3                                      | -2.46 | 3.3E-02 |
| 64380  | Ms4a4c  | membrane-spanning 4-domains, subfamily A, member 4C | -2.64 | 1.3E-03 |
| 231507 | Plac8   | placenta-specific 8                                 | -2.66 | 1.8E-03 |
| 13861  | Epx     | eosinophil peroxidase                               | -2.69 | 3.0E-02 |
| 20343  | Sell    | selectin, lymphocyte                                | -2.74 | 5.5E-03 |
| 328563 | Apol11b | apolipoprotein L 11b                                | -2.83 | 8.5E-03 |
| 20558  | Sifn4   | schlafen 4                                          | -3.36 | 7.1E-04 |



SUPPLEMENTARY DATA

**Supplementary Table 8. The overlap summary of four SCN DEG sets in Figure 6A.** The numbers in each cell follow the "A (B | C)" format, where A is the number of common DEGs, B is the number of common DEGs with the same direction of change, and C is the number of DEGs with opposite direction of change.

| DEG Sets                     |        | <i>db/+ vs db/+ PIO</i> | <i>db/+ vs db/db</i> | <i>db/+ PIO vs db/db PIO</i> | <i>db/db vs db/db PIO</i> |
|------------------------------|--------|-------------------------|----------------------|------------------------------|---------------------------|
|                              | # DEGs | 1182                    | 1066                 | 2596                         | 4537                      |
| <i>db/+ vs db/+ PIO</i>      | 1182   | 1182 (1182 0)           | 187 (149 38)         | 374 (308 66)                 | 872 (867 5)               |
| <i>db/+ vs db/db</i>         | 1066   | 187 (149 38)            | 1066 (1066 0)        | 452 (436 16)                 | 484 (161 323)             |
| <i>db/+ PIO vs db/db PIO</i> | 2596   | 374 (308 66)            | 452 (436 16)         | 2596 (2596 0)                | 1600 (1559 41)            |
| <i>db/db vs db/db PIO</i>    | 4537   | 872 (867 5)             | 484 (161 323)        | 1600 (1559 41)               | 4537 (4537 0)             |

SUPPLEMENTARY DATA

**Supplementary Table 9. The 20 most up-regulated genes and 20 most down-regulated genes that are dysregulated by diabetes and reversed by pioglitazone treatment in SCN.** FC: fold-change; FDR: false discovery rate. Color indicates the up (red) or down (blue) regulation in the second group (eg. *db/db* in the *db/+* vs *db/db* comparison)

| GeneID | Symbol        | Description                                                                 | <i>db/+</i> vs <i>db/db</i> |         | <i>db/db</i> vs <i>db/db</i> PIO |         |
|--------|---------------|-----------------------------------------------------------------------------|-----------------------------|---------|----------------------------------|---------|
|        |               |                                                                             | FC                          | FDR     | FC                               | FDR     |
| 20284  | Scrg1         | scrapie responsive gene 1                                                   | 3.17                        | 7.9E-03 | -1.88                            | 1.9E-02 |
| 240332 | Slc6a7        | solute carrier family 6 (neurotransmitter transporter, L-proline), member 7 | 3.07                        | 1.7E-06 | -2.53                            | 2.3E-06 |
| 24111  | Uts2          | urotensin 2                                                                 | 3.01                        | 8.0E-05 | -1.58                            | 5.9E-03 |
| 58222  | Rab37         | RAB37, member of RAS oncogene family                                        | 2.50                        | 1.5E-04 | -1.61                            | 7.1E-03 |
| 66526  | Tceanc2       | RIKEN cDNA 2210012G02 gene                                                  | 2.50                        | 2.0E-02 | -2.13                            | 2.7E-02 |
| 223920 | Soat2         | sterol O-acyltransferase 2                                                  | 2.48                        | 9.1E-04 | -2.04                            | 5.4E-04 |
| 21956  | Tnnt2         | troponin T2, cardiac                                                        | 2.33                        | 1.1E-03 | -1.35                            | 3.3E-02 |
| 11685  | Alox12e       | arachidonate lipoxygenase, epidermal                                        | 2.30                        | 1.4E-04 | -1.84                            | 8.4E-04 |
| 18039  | Nefl          | neurofilament, light polypeptide                                            | 2.17                        | 4.9E-04 | -2.10                            | 2.9E-04 |
| 66809  | Krt20         | keratin 20                                                                  | 2.11                        | 2.1E-03 | -1.42                            | 2.5E-02 |
| 381319 | Batf3         | basic leucine zipper transcription factor, ATF-like 3                       | 2.10                        | 5.4E-04 | -1.51                            | 8.0E-04 |
| 12659  | Ovgp1         | oviductal glycoprotein 1                                                    | 2.10                        | 4.4E-04 | -1.33                            | 3.5E-02 |
| 11601  | Angpt2        | angiopoietin 2                                                              | 2.07                        | 4.0E-03 | -1.78                            | 2.7E-04 |
| 56747  | Sez6l         | seizure related 6 homolog like                                              | 2.06                        | 5.0E-03 | -1.62                            | 2.3E-02 |
| 76640  | 1700113H08Rik | RIKEN cDNA 1700113H08 gene                                                  | 2.00                        | 1.5E-02 | -1.72                            | 4.7E-03 |
| 70571  | Tcerg1l       | transcription elongation regulator 1-like                                   | 1.99                        | 1.5E-02 | -2.09                            | 3.5E-03 |
| 235048 | Zfp599        | zinc finger protein 599                                                     | 1.95                        | 3.3E-02 | -2.01                            | 2.2E-03 |
| 22360  | Nrsn1         | neurensin 1                                                                 | 1.95                        | 1.1E-02 | -1.61                            | 5.6E-03 |
| 11830  | Aqp5          | aquaporin 5                                                                 | 1.92                        | 1.3E-02 | -2.92                            | 4.0E-05 |
| 230678 | Tmem125       | transmembrane protein 125                                                   | 1.89                        | 2.6E-03 | -1.86                            | 7.5E-04 |
| 17329  | Cxcl9         | chemokine (C-X-C motif) ligand 9                                            | -1.99                       | 2.5E-02 | 11.06                            | 8.6E-04 |
| 58805  | Mlxipl        | MLX interacting protein-like                                                | -2.01                       | 3.5E-02 | 3.37                             | 9.6E-05 |
| 20528  | Slc2a4        | solute carrier family 2 (facilitated glucose transporter), member 4         | -2.02                       | 7.8E-03 | 3.51                             | 8.2E-06 |
| 171180 | Syt12         | synaptotagmin XII                                                           | -2.06                       | 4.1E-02 | 2.83                             | 1.8E-05 |
| 22117  | Tst           | thiosulfate sulfurtransferase, mitochondrial                                | -2.08                       | 1.4E-04 | 2.19                             | 1.2E-05 |
| 58200  | Ppp1r1a       | protein phosphatase 1, regulatory (inhibitor) subunit 1A                    | -2.19                       | 2.3E-03 | 8.21                             | 3.2E-07 |

SUPPLEMENTARY DATA

| GeneID | Symbol | Description                                                                 | <i>db/+ vs db/db</i> |         | <i>db/db vs db/db PIO</i> |         |
|--------|--------|-----------------------------------------------------------------------------|----------------------|---------|---------------------------|---------|
|        |        |                                                                             | FC                   | FDR     | FC                        | FDR     |
| 21835  | Thrsp  | thyroid hormone responsive SPOT14 homolog (Rattus)                          | -2.28                | 1.5E-02 | 3.67                      | 7.8E-06 |
| 104158 | Ces1d  | carboxylesterase 1D                                                         | -2.32                | 2.2E-02 | 2.95                      | 1.7E-03 |
| 53311  | Mybph  | myosin binding protein H                                                    | -2.36                | 1.9E-03 | 1.77                      | 2.6E-03 |
| 26464  | Vnn3   | vanin 3                                                                     | -2.39                | 2.4E-02 | 2.23                      | 3.7E-03 |
| 13106  | Cyp2e1 | cytochrome P450, family 2, subfamily e, polypeptide 1                       | -2.53                | 3.0E-04 | 3.28                      | 8.2E-06 |
| 83961  | Nrg4   | neuregulin 4                                                                | -2.64                | 5.2E-03 | 4.77                      | 2.5E-05 |
| 170786 | Cd209a | CD209a antigen                                                              | -2.68                | 4.6E-03 | 1.79                      | 4.8E-02 |
| 243270 | Gpr81  | G protein-coupled receptor 81                                               | -2.77                | 4.1E-02 | 2.04                      | 1.7E-02 |
| 12683  | Cidea  | cell death-inducing DNA fragmentation factor, alpha subunit-like effector A | -2.82                | 9.8E-03 | 71.60                     | 2.5E-07 |
| 18534  | Pck1   | phosphoenolpyruvate carboxykinase 1, cytosolic                              | -3.07                | 1.5E-02 | 2.90                      | 1.4E-03 |
| 234564 | Ces1f  | carboxylesterase 1F                                                         | -5.27                | 5.0E-03 | 7.16                      | 8.5E-04 |
| 68393  | Mogat1 | monoacylglycerol O-acyltransferase 1                                        | -5.47                | 8.0E-05 | 1.89                      | 1.2E-03 |
| 20319  | Sfrp2  | secreted frizzled-related protein 2                                         | -5.48                | 1.4E-04 | 3.73                      | 1.1E-04 |
| 13107  | Cyp2f2 | cytochrome P450, family 2, subfamily f, polypeptide 2                       | -30.87               | 1.6E-10 | 3.63                      | 6.4E-04 |

SUPPLEMENTARY DATA

**Supplementary Table 10. The 20 most up-regulated genes and 20 most down-regulated genes that are dysregulated by diabetes and exacerbated by pioglitazone treatment in SCN.** FC: fold-change; FDR: false discovery rate. Color indicates the up (red) or down (blue) regulation in the second group (eg. *db/db* in the *db/+* vs *db/db* comparison)

| GeneID | Symbol   | Description                                             | <i>db/+</i> vs <i>db/db</i> |         | <i>db/db</i> vs <i>db/db</i> PIO |         |
|--------|----------|---------------------------------------------------------|-----------------------------|---------|----------------------------------|---------|
|        |          |                                                         | FC                          | FDR     | FC                               | FDR     |
| 93726  | Ear11    | eosinophil-associated, ribonuclease A family, member 11 | 26.17                       | 1.2E-03 | 7.96                             | 4.2E-04 |
| 24108  | Ubd      | ubiquitin D                                             | 8.57                        | 3.2E-03 | 6.22                             | 4.6E-04 |
| 67717  | Lipf     | lipase, gastric                                         | 6.46                        | 1.9E-02 | 4.74                             | 1.6E-03 |
| 381974 | Mrgprg   | MAS-related GPR, member G                               | 5.44                        | 1.9E-03 | 2.63                             | 6.1E-03 |
| 16009  | Igfbp3   | insulin-like growth factor binding protein 3            | 3.54                        | 1.1E-04 | 1.38                             | 2.2E-02 |
| 11425  | Apoc4    | apolipoprotein C-IV                                     | 3.35                        | 1.9E-03 | 3.62                             | 1.0E-04 |
| 11813  | Apoc2    | apolipoprotein C-II                                     | 3.25                        | 9.5E-03 | 2.81                             | 2.2E-03 |
| 433470 | AA467197 | expressed sequence AA467197                             | 2.78                        | 8.4E-03 | 5.28                             | 4.0E-03 |
| 17896  | Myl4     | myosin, light polypeptide 4                             | 2.17                        | 7.3E-03 | 1.93                             | 1.7E-03 |
| 16846  | Lep      | leptin                                                  | 2.15                        | 8.2E-03 | 1.44                             | 1.8E-02 |
| 13723  | Emb      | embigin                                                 | 2.14                        | 3.2E-02 | 1.85                             | 1.7E-02 |
| 213696 | Duoxa1   | dual oxidase maturation factor 1                        | 2.04                        | 1.2E-03 | 1.99                             | 6.7E-05 |
| 21857  | Timp1    | tissue inhibitor of metalloproteinase 1                 | 1.89                        | 1.6E-02 | 2.13                             | 4.8E-02 |
| 21906  | Otop1    | otopetrin 1                                             | 1.85                        | 7.3E-03 | 1.87                             | 1.6E-03 |
| 20753  | Sprr1a   | small proline-rich protein 1A                           | 1.80                        | 2.6E-02 | 2.70                             | 8.0E-03 |
| 15484  | Hsd11b2  | hydroxysteroid 11-beta dehydrogenase 2                  | 1.80                        | 9.9E-03 | 1.43                             | 3.6E-02 |
| 14168  | Fgf13    | fibroblast growth factor 13                             | 1.77                        | 1.5E-02 | 2.75                             | 4.8E-05 |
| 68453  | Gpihbp1  | GPI-anchored HDL-binding protein 1                      | 1.73                        | 1.1E-02 | 1.87                             | 2.5E-04 |
| 12534  | Cdk1     | cyclin-dependent kinase 1                               | 1.72                        | 4.3E-02 | 1.71                             | 2.2E-02 |
| 232599 | Gm4876   | predicted gene 4876                                     | 1.65                        | 1.0E-02 | 1.48                             | 4.9E-02 |
| 14706  | Gng4     | guanine nucleotide binding protein (G protein), gamma 4 | -1.64                       | 4.6E-03 | -1.47                            | 2.2E-02 |
| 72324  | Plxdc1   | plexin domain containing 1                              | -1.65                       | 8.2E-03 | -1.93                            | 2.1E-04 |
| 384009 | Glipr2   | GLI pathogenesis-related 2                              | -1.65                       | 1.4E-02 | -1.32                            | 4.6E-02 |
| 19275  | Ptprn    | protein tyrosine phosphatase, receptor type, N          | -1.73                       | 5.9E-03 | -1.39                            | 2.5E-02 |
| 12578  | Cdkn2a   | cyclin-dependent kinase inhibitor 2A                    | -1.75                       | 8.0E-03 | -1.68                            | 4.7E-03 |
| 244654 | Mtss1l   | metastasis suppressor 1-like                            | -1.80                       | 1.3E-02 | -1.60                            | 3.5E-02 |

SUPPLEMENTARY DATA

| GeneID | Symbol  | Description                                       | <i>db/+ vs db/db</i> |         | <i>db/db vs db/db PIO</i> |         |
|--------|---------|---------------------------------------------------|----------------------|---------|---------------------------|---------|
|        |         |                                                   | FC                   | FDR     | FC                        | FDR     |
| 11514  | Adcy8   | adenylate cyclase 8                               | -1.80                | 6.2E-03 | -2.00                     | 2.2E-03 |
| 11537  | Cfd     | complement factor D (adipsin)                     | -1.81                | 6.3E-04 | -1.65                     | 2.1E-03 |
| 170741 | Pilrb1  | paired immunoglobulin-like type 2 receptor beta 1 | -1.89                | 1.9E-02 | -1.95                     | 4.3E-04 |
| 64082  | Popdc2  | popeye domain containing 2                        | -1.90                | 1.1E-02 | -1.63                     | 3.5E-02 |
| 104885 | Tmem179 | transmembrane protein 179                         | -1.92                | 8.3E-03 | -2.02                     | 2.4E-05 |
| 80891  | Fcrls   | Fc receptor-like 5, scavenger receptor            | -1.99                | 1.5E-03 | -2.10                     | 7.7E-05 |
| 19242  | Ptn     | pleiotrophin                                      | -2.12                | 1.2E-02 | -1.78                     | 1.4E-03 |
| 13138  | Dag1    | dystroglycan 1                                    | -2.21                | 4.4E-02 | -1.62                     | 1.3E-03 |
| 66198  | Them5   | thioesterase superfamily member 5                 | -2.21                | 1.1E-04 | -1.69                     | 3.8E-03 |
| 12970  | Crygs   | crystallin, gamma S                               | -2.31                | 4.6E-03 | -1.63                     | 1.6E-02 |
| 20983  | Syt4    | synaptotagmin IV                                  | -2.79                | 1.1E-04 | -1.50                     | 1.3E-02 |
| 12824  | Col2a1  | collagen, type II, alpha 1                        | -2.89                | 5.0E-04 | -3.49                     | 3.1E-05 |
| 17395  | Mmp9    | matrix metalloproteinase 9                        | -3.45                | 2.1E-04 | -1.61                     | 2.6E-02 |
| 18979  | Pon1    | paraoxonase 1                                     | -16.82               | 4.1E-08 | -2.57                     | 1.3E-03 |

SUPPLEMENTARY DATA

**Supplementary Table 11. The 20 most up-regulated genes and 20 most down-regulated genes that are dysregulated only by diabetes (*db/+* vs *db/db*) and not by pioglitazone treatment in SCN. FC: fold-change; FDR: false discovery rate.**

| GeneID | Symbol   | Description                                                           | FC    | FDR     |
|--------|----------|-----------------------------------------------------------------------|-------|---------|
| 17381  | Mmp12    | matrix metalloproteinase 12                                           | 44.77 | 1.3E-04 |
| 216343 | Tph2     | tryptophan hydroxylase 2                                              | 11.70 | 1.1E-03 |
| 16411  | Itgax    | integrin alpha X                                                      | 9.52  | 8.3E-04 |
| 242341 | Atp6v0d2 | ATPase, H <sup>+</sup> transporting, lysosomal V0 subunit D2          | 9.13  | 5.5E-04 |
| 71760  | Agxt2l1  | alanine-glyoxylate aminotransferase 2-like 1                          | 6.39  | 4.1E-08 |
| 14068  | F7       | coagulation factor VII                                                | 6.10  | 3.3E-03 |
| 16197  | Il7r     | interleukin 7 receptor                                                | 6.00  | 1.8E-03 |
| 17474  | Clec4d   | C-type lectin domain family 4, member d                               | 5.28  | 3.6E-03 |
| 11501  | Adam8    | a disintegrin and metalloproteinase domain 8                          | 5.24  | 2.1E-03 |
| 18430  | Oxtr     | oxytocin receptor                                                     | 5.11  | 5.0E-04 |
| 232680 | Cpa2     | carboxypeptidase A2, pancreatic                                       | 4.97  | 9.5E-03 |
| 75766  | Dcstamp  | transmembrane 7 superfamily member 4                                  | 4.33  | 7.5E-03 |
| 50778  | Rgs1     | regulator of G-protein signaling 1                                    | 4.14  | 1.4E-02 |
| 50765  | Tfr2     | transferrin receptor 2                                                | 4.08  | 2.3E-03 |
| 12309  | S100g    | S100 calcium binding protein G                                        | 3.84  | 6.5E-04 |
| 12523  | Cd84     | CD84 antigen                                                          | 3.84  | 7.8E-03 |
| 278180 | Vsig4    | V-set and immunoglobulin domain containing 4                          | 3.35  | 8.2E-03 |
| 234421 | Cib3     | calcium and integrin binding family member 3                          | 3.27  | 1.4E-04 |
| 56857  | Slc37a2  | solute carrier family 37 (glycerol-3-phosphate transporter), member 2 | 3.21  | 8.3E-04 |
| 109648 | Npy      | neuropeptide Y                                                        | 3.09  | 2.1E-03 |
| 13003  | Vcan     | versican                                                              | -1.95 | 3.5E-05 |
| 56811  | Dkk2     | dickkopf homolog 2 ( <i>Xenopus laevis</i> )                          | -1.95 | 2.4E-02 |
| 57764  | Ntn4     | netrin 4                                                              | -1.96 | 1.8E-03 |
| 50786  | Hs6st2   | heparan sulfate 6-O-sulfotransferase 2                                | -1.98 | 2.1E-03 |
| 16005  | Igfals   | insulin-like growth factor binding protein, acid labile subunit       | -2.04 | 3.4E-02 |
| 74342  | Lrrtm1   | leucine rich repeat transmembrane neuronal 1                          | -2.04 | 4.4E-03 |
| 24110  | Usp18    | ubiquitin specific peptidase 18                                       | -2.08 | 4.8E-04 |
| 16668  | Krt18    | keratin 18                                                            | -2.11 | 2.4E-03 |

SUPPLEMENTARY DATA

| GeneID | Symbol        | Description                                        | FC    | FDR     |
|--------|---------------|----------------------------------------------------|-------|---------|
| 319783 | A730056A06Rik | RIKEN cDNA A730056A06 gene                         | -2.27 | 2.6E-02 |
| 233271 | Luzp2         | leucine zipper protein 2                           | -2.34 | 5.2E-03 |
| 19662  | Rbp4          | retinol binding protein 4, plasma                  | -2.35 | 2.5E-03 |
| 14172  | Fgf18         | fibroblast growth factor 18                        | -2.35 | 9.5E-03 |
| 11657  | Alb           | albumin                                            | -2.44 | 1.5E-02 |
| 64661  | Krtdap        | keratinocyte differentiation associated protein    | -2.58 | 3.0E-03 |
| 71412  | Dhrs2         | dehydrogenase/reductase member 2                   | -2.60 | 1.1E-04 |
| 330908 | Opcml         | opioid binding protein/cell adhesion molecule-like | -2.67 | 9.1E-04 |
| 56471  | Stmn4         | stathmin-like 4                                    | -2.68 | 2.8E-03 |
| 69123  | Eci3          | RIKEN cDNA 1810022C23 gene                         | -2.81 | 3.4E-03 |
| 11556  | Adrb3         | adrenergic receptor, beta 3                        | -2.82 | 5.7E-03 |
| 16178  | Il1r2         | interleukin 1 receptor, type II                    | -2.96 | 7.8E-03 |

SUPPLEMENTARY DATA

**Supplementary Table 12. The 20 most up-regulated genes and 20 most down-regulated genes that are dysregulated only by pioglitazone treatment (*db/db* vs *db/db* PIO) and not by diabetes (*db/+* vs *db/db*) in SCN. FC: fold-change; FDR: false discovery rate.**

| GeneID | Symbol        | Description                                                                        | FC     | FDR     |
|--------|---------------|------------------------------------------------------------------------------------|--------|---------|
| 22227  | Ucp1          | uncoupling protein 1 (mitochondrial, proton carrier)                               | 146.47 | 2.5E-08 |
| 12686  | Elovl3        | elongation of very long chain fatty acids (FEN1/Elo2, SUR4/Elo3, yeast)-like 3     | 125.66 | 4.2E-10 |
| 232493 | Gys2          | glycogen synthase 2                                                                | 32.25  | 2.3E-08 |
| 67758  | Aadac         | arylacetamide deacetylase (esterase)                                               | 29.90  | 4.0E-08 |
| 228677 | Sptlc3        | serine palmitoyltransferase, long chain base subunit 3                             | 27.72  | 2.2E-10 |
| 78977  | Popdc3        | popeye domain containing 3                                                         | 26.71  | 2.6E-07 |
| 12869  | Cox8b         | cytochrome c oxidase, subunit VIIIb                                                | 16.95  | 2.0E-05 |
| 13088  | Cyp2b10       | cytochrome P450, family 2, subfamily b, polypeptide 10                             | 15.33  | 7.9E-06 |
| 13004  | Ncan          | neurocan                                                                           | 11.07  | 3.8E-06 |
| 107146 | Glyat         | glycine-N-acyltransferase                                                          | 10.66  | 9.4E-04 |
| 66968  | Plin5         | perilipin 5                                                                        | 10.01  | 3.4E-06 |
| 68172  | Rpl39l        | ribosomal protein L39-like                                                         | 9.92   | 2.2E-03 |
| 11489  | Adam12        | a disintegrin and metallopeptidase domain 12 (meltrin alpha)                       | 9.48   | 7.9E-07 |
| 268345 | Kcnc2         | potassium voltage gated channel, Shaw-related subfamily, member 2                  | 9.25   | 2.8E-06 |
| 74121  | Acox1         | acyl-Coenzyme A oxidase-like                                                       | 9.04   | 1.8E-06 |
| 108812 | Als2cr12      | amyotrophic lateral sclerosis 2 (juvenile) chromosome region, candidate 12 (human) | 8.51   | 1.5E-05 |
| 109245 | Lrrc39        | leucine rich repeat containing 39                                                  | 7.89   | 1.2E-05 |
| 108078 | Olr1          | oxidized low density lipoprotein (lectin-like) receptor 1                          | 7.85   | 1.2E-04 |
| 105892 | 9030619P08Rik | RIKEN cDNA 9030619P08 gene                                                         | 7.71   | 1.2E-06 |
| 75552  | Paqr9         | progesterin and adipoQ receptor family member IX                                   | 7.19   | 4.3E-06 |
| 56839  | Lgi1          | leucine-rich repeat LGI family, member 1                                           | -2.36  | 1.3E-05 |
| 73720  | Cst6          | cystatin E/M                                                                       | -2.45  | 5.3E-05 |
| 209966 | Pgbd5         | piggyBac transposable element derived 5                                            | -2.46  | 8.6E-05 |
| 140703 | Emid1         | EMI domain containing 1                                                            | -2.46  | 1.7E-05 |
| 64385  | Cyp4f14       | cytochrome P450, family 4, subfamily f, polypeptide 14                             | -2.48  | 8.4E-04 |
| 13516  | Epyc          | epiphycan                                                                          | -2.49  | 2.0E-03 |
| 22287  | Scgb1a1       | secretoglobin, family 1A, member 1 (uteroglobin)                                   | -2.49  | 1.0E-04 |
| 232345 | A2m           | alpha-2-macroglobulin                                                              | -2.49  | 2.1E-06 |



SUPPLEMENTARY DATA

| GeneID | Symbol        | Description                                              | FC     | FDR     |
|--------|---------------|----------------------------------------------------------|--------|---------|
| 16780  | Lamb3         | laminin, beta 3                                          | -2.57  | 2.1E-05 |
| 140904 | Caln1         | calneuron 1                                              | -2.59  | 5.4E-04 |
| 73712  | Dmkn          | dermokine                                                | -2.60  | 1.0E-04 |
| 240753 | Plekha6       | pleckstrin homology domain containing, family A member 6 | -2.63  | 2.6E-05 |
| 216166 | Plk5          | polo-like kinase 5 (Drosophila)                          | -2.64  | 1.3E-04 |
| 19227  | Pthlh         | parathyroid hormone-like peptide                         | -2.66  | 4.1E-04 |
| 53419  | Corin         | corin                                                    | -2.68  | 1.3E-03 |
| 76797  | 2410137M14Rik | RIKEN cDNA 2410137M14 gene                               | -2.71  | 7.4E-03 |
| 12386  | Ctnna2        | catenin (cadherin associated protein), alpha 2           | -2.90  | 4.6E-05 |
| 619665 | Klf14         | Kruppel-like factor 14                                   | -3.11  | 1.2E-04 |
| 64929  | Scel          | sciellin                                                 | -3.66  | 1.1E-02 |
| 76757  | Trdn          | triadin                                                  | -11.43 | 2.0E-04 |
